# Supplementary material
Source: Springer Nature journal article supplement (https://www.springermedizin.de/resource/supplementary/13014_2013_844_MOESM4_ESM.pdf/9634262)

# BIOCHEMICAL CONTROL

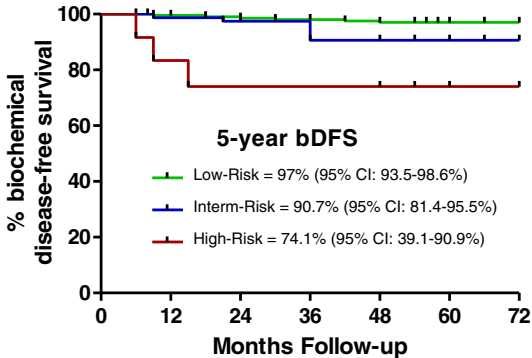

Pt Response:

|      |     |     |     |     |     |     |    |
|------|-----|-----|-----|-----|-----|-----|----|
| Low  | 211 | 206 | 202 | 197 | 193 | 127 | 44 |
| Int  | 81  | 79  | 74  | 72  | 66  | 42  | 9  |
| High | 12  | 12  | 10  | 10  | 8   | 4   | 1  |

Supplement: MOESM4 [file 9634262]
